# Supplementary material for: Selenadiazole derivatives antagonize hyperglycemia-induced drug resistance in breast cancer cells by activation of AMPK pathways
Source: Royal Society of Chemistry journal article supplement (doi:10.1039/c7mt00001d), 2017-01-01
Supplement: c7mt00001d1.pdf [file c7mt00001d1.pdf]

## Supporting Information

For

### Selenadiazole Derivatives Antagonize Hyperglycemia-Induced Drug Resistance in Breast Cancer Cells by Activation of AMPK Pathway

#### Results

**Table S1.** Cytotoxic effects of antitumor drugs on MCF-7 cells for 48 h incubation.

| MCF-7<br>Glucose | IC <sub>50</sub> (μM) |           |       |      |       |
|------------------|-----------------------|-----------|-------|------|-------|
|                  | DOX                   | Cisplatin | CCUN  | CTX  | PTX   |
| 1000             | 0.9                   | 39.61     | 595.6 | 2169 | 8.281 |
| 1980             | 1.12                  | 57.63     | 612.6 | 2134 | 8.67  |
| 4500             | 1.4                   | 66.58     | 548.6 | 2388 | 9.013 |

Glu: Glucose

**Table S2.** Cytotoxic effects of benzo[c][1,2,5]selenadiazole derivatives on MCF-7 cells for 48 h incubation.

| MCF-7<br>Glucose | IC <sub>50</sub> (μM) |       |       |       |      |       |      |
|------------------|-----------------------|-------|-------|-------|------|-------|------|
|                  | 1a                    | 1b    | 1c    | 1d    | 2a   | 2b    | 2c   |
| 1000             | 22.3                  | 6.8   | 46.8  | 89.07 | 57.9 | 39.9  | 4.5  |
| 1980             | 25.75                 | 9.7   | 52.1  | 95.2  | 61.1 | 42.1  | 4.8  |
| 4500             | 29.77                 | 11.75 | 56.98 | 103.7 | 63.7 | 44.53 | 6.15 |

**Table S3.** Cytotoxic effects of benzo[*c*][1,2,5]selenadiazole derivatives on normal cell lines for 48 h incubation

| Cell lines        | IC <sub>50</sub> (μM) |       |       |       |      |       |      |
|-------------------|-----------------------|-------|-------|-------|------|-------|------|
|                   | 1a                    | 1b    | 1c    | 1d    | 2a   | 2b    | 2c   |
| MCF-7             | 29.77                 | 11.75 | 56.98 | 103.7 | 63.7 | 44.53 | 6.15 |
| HK-2 <sup>#</sup> | >400                  | 106   | >400  | >400  | >400 | 280   | 141  |

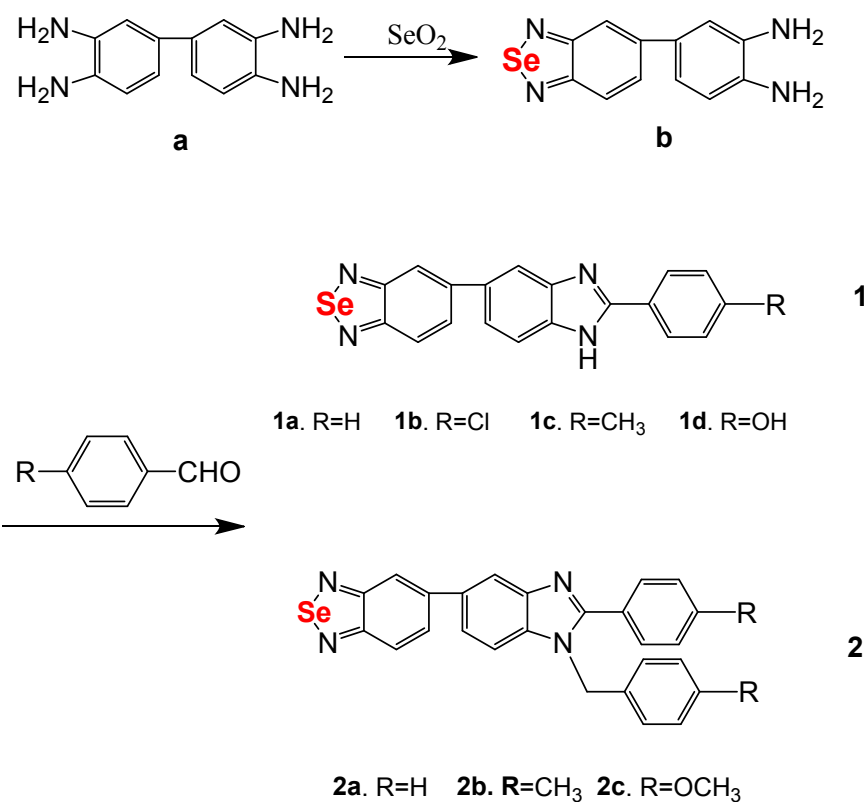

**Figure S1.** Synthetic route of 1a-1d, 2a-2c.
